# Supplementary material
Source: Springer Nature journal article supplement (https://www.springermedizin.de/resource/supplementary/13256_2010_1618_MOESM2_ESM.pdf/9648094)

A

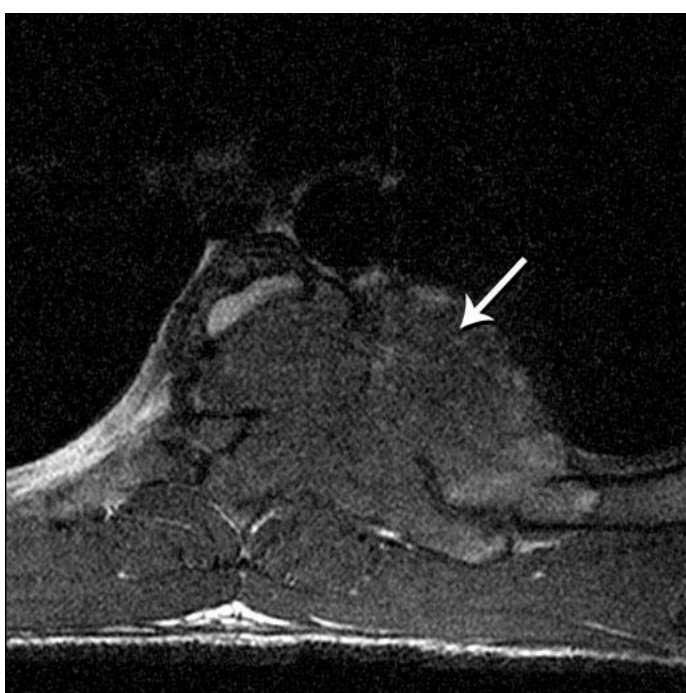

B

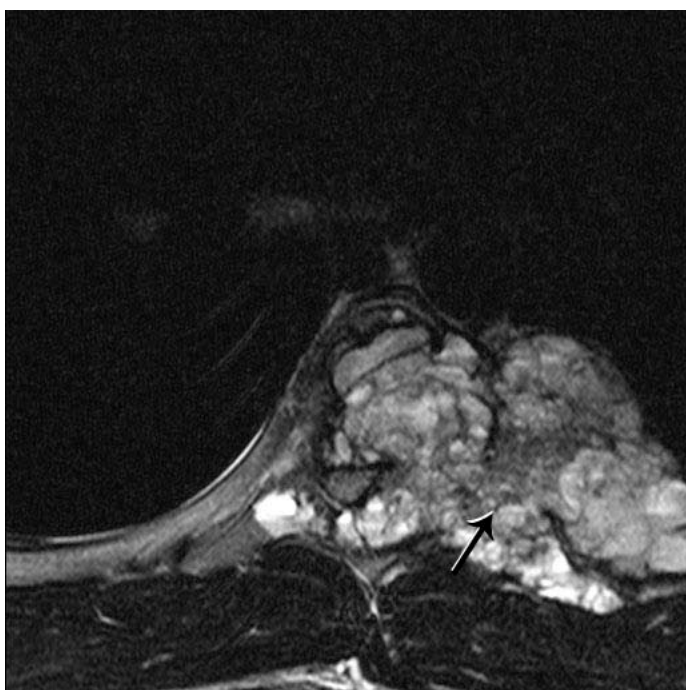

C

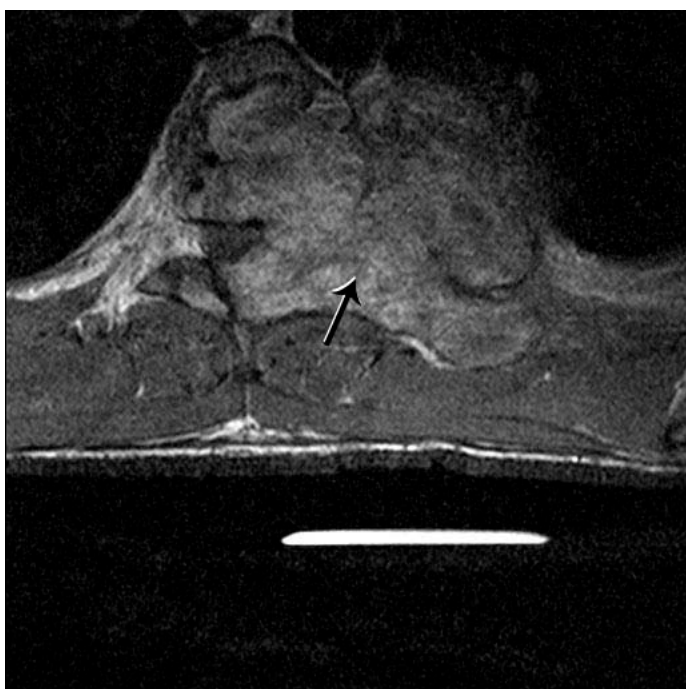

Supplement: MOESM2 [file 9648094]
